# Supplementary material for: Highly dispersed Pd nanoparticles anchored on carbon nitride for hydrogen production from formic acid
Source: Royal Society of Chemistry journal article supplement (doi:10.1039/d3nj03171c), 2023-01-01
Supplement: d3nj03171c1.pdf [file d3nj03171c1.pdf]

**High dispersed Pd nanoparticles anchored on carbon nitride for  
hydrogen production of formic acid**

**Qing-Fang Deng\*, Kun Qian, Jingyu Zhang, Shangkun Ma, Jianjiao Xin, Fengjuan Cui,  
Chunling Zuo, Lihua Jia\***

*College of Chemistry and Chemical Engineering, Qiqihar University, Qiqihar 161006, China*

## Experimental

### Synthesis of CN-UW

20 g urea was dissolved in 20 mL of deionized water. The solution was then transferred to a 100 mL capped ceramic crucible and calcined at 823 K for 4 hours. After cooling the crucible to ambient temperature, a light-yellow product of ultrathin CN nanosheets was formed, designated as CN-U<sub>1</sub>W<sub>1</sub>. Finally, CN-U<sub>1</sub>W<sub>x</sub> were produced by varying the mass ratio of urea in solution ( $m_{\text{urea}}: m_{\text{water}} = 1:2, 1:3, 1:5, \text{ and } 1:7$ ), and the corresponding products were labeled as CN-U<sub>1</sub>W<sub>3</sub>, CN-U<sub>1</sub>W<sub>5</sub>, and CN-U<sub>1</sub>W<sub>7</sub>, respectively. The same procedure was used to make CN-U without the need of water.

### Synthesis of Pd/CN-UW

Ultrasonic treatment was used to disperse 0.27 g of CN-U<sub>1</sub>W<sub>1</sub> in 60 mL of H<sub>2</sub>O. Next, 0.065g of the metal precursor Pd(NO<sub>3</sub>)<sub>2</sub> was added to the suspension, which was then magnetically stirred for three hours. The mixture was injected with 10 mL (0.3M) of NaBH<sub>4</sub> solution and vigorously stirred for four hours prior to centrifugation and washing with deionized water three times. The catalysts were then dried for 24 hours at 353 K. A series of Pd/CN- U<sub>1</sub>W<sub>x</sub> catalysts were also synthesized using the same method, and the resulting products were labeled Pd/CN-U<sub>1</sub>W<sub>1</sub>, Pd/CN-U<sub>1</sub>W<sub>3</sub>, Pd/CN-U<sub>1</sub>W<sub>5</sub>, Pd/CN-U<sub>1</sub>W<sub>7</sub> and Pd/CN-U, respectively.

### Characterizations

Using a Bruker D8 Advance diffractometer equipped with Cu K $\alpha$  radiation at 40 kV and 50 mA over a scanning range of 3-80° (2 $\theta$ ), X-ray diffraction (XRD) patterns of the test samples were acquired. Using a Tecnai G2 TF30 transmission electron microscope (TEM) with an acceleration voltage of 300 kV, the morphologies and particle sizes of the samples were examined. The materials were analyzed by X-ray photoelectron spectroscopy (XPS) using a VGA ESCALAB 250 spectrometer (Thermo Electron, UK) equipped with a non-monochromatic Al K $\alpha$  X-ray source (1486 eV). As a reference for calibrating the binding energies, the carbonaceous C 1s line (284.8 eV) was used. On the Agilent 5800, the inductively coupled plasma-optical emission spectrometer (ICP-

OES) was measured.

### Catalytic activity tests for FA dehydrogenation (FAD)

For the catalytic experiment, 50 mg of catalyst was dissolved in deionized water in a round-bottom flask. The reaction flask was attached to the water-filled gas burette in order to measure the amount of gas produced. FA/SF (sodium formate) reaction liquid ( $n_{\text{FA}}/n_{\text{SF}} = 1:8$ ; FA = 2 mmol) was fed into the flask with magnetic stirring at 348 K in an ambient environment and gas production commenced.

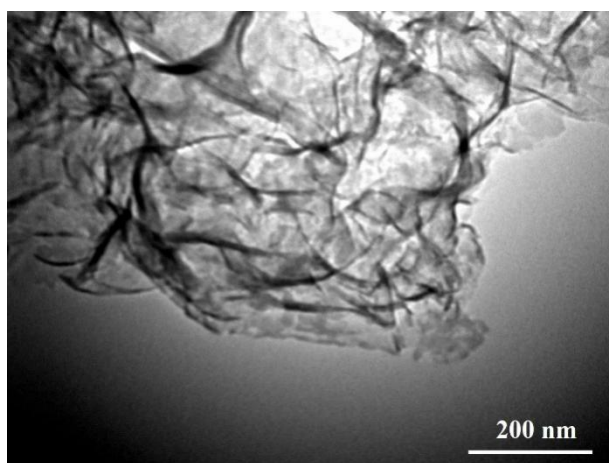

Fig. S1 TEM image of CN-U<sub>1</sub>W<sub>5</sub>.

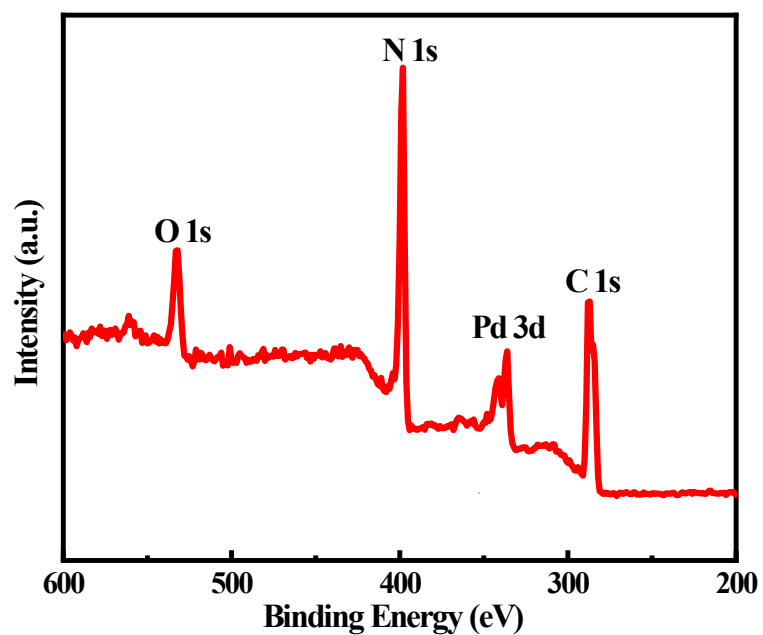

Fig. S2 XPS survey spectra of Pd/CN-U<sub>1</sub>W<sub>5</sub>.

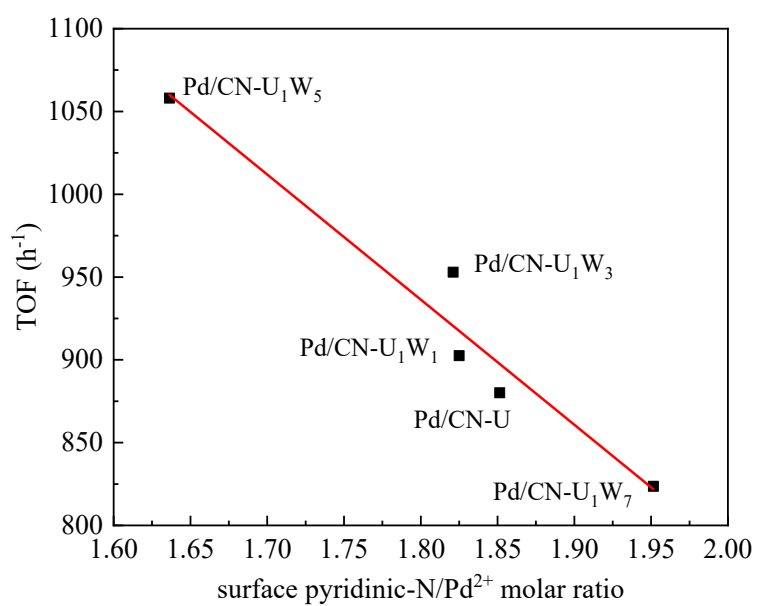

Fig. S3 The relationship of the TOF and surface pyridinic N/Pd molar ratio

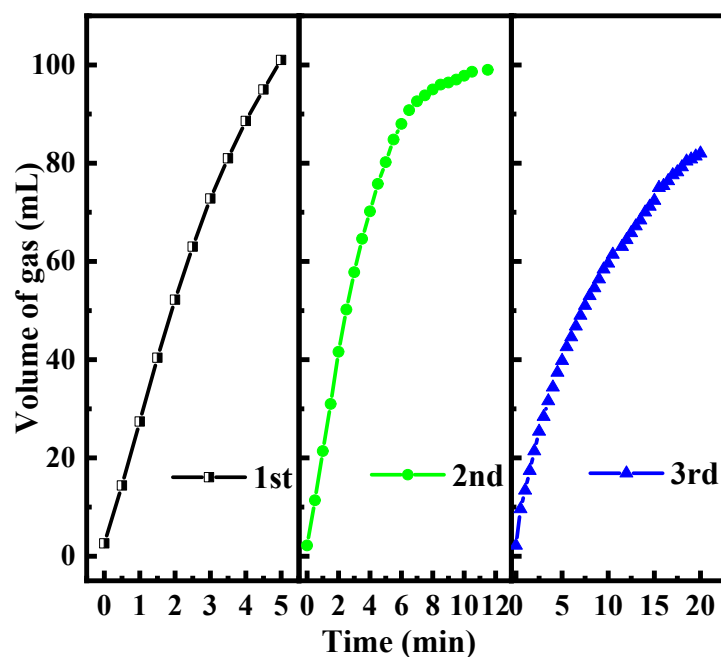

Fig. S4 The stability of Pd/CN-U<sub>1</sub>W<sub>5</sub> catalyst at 348 K.

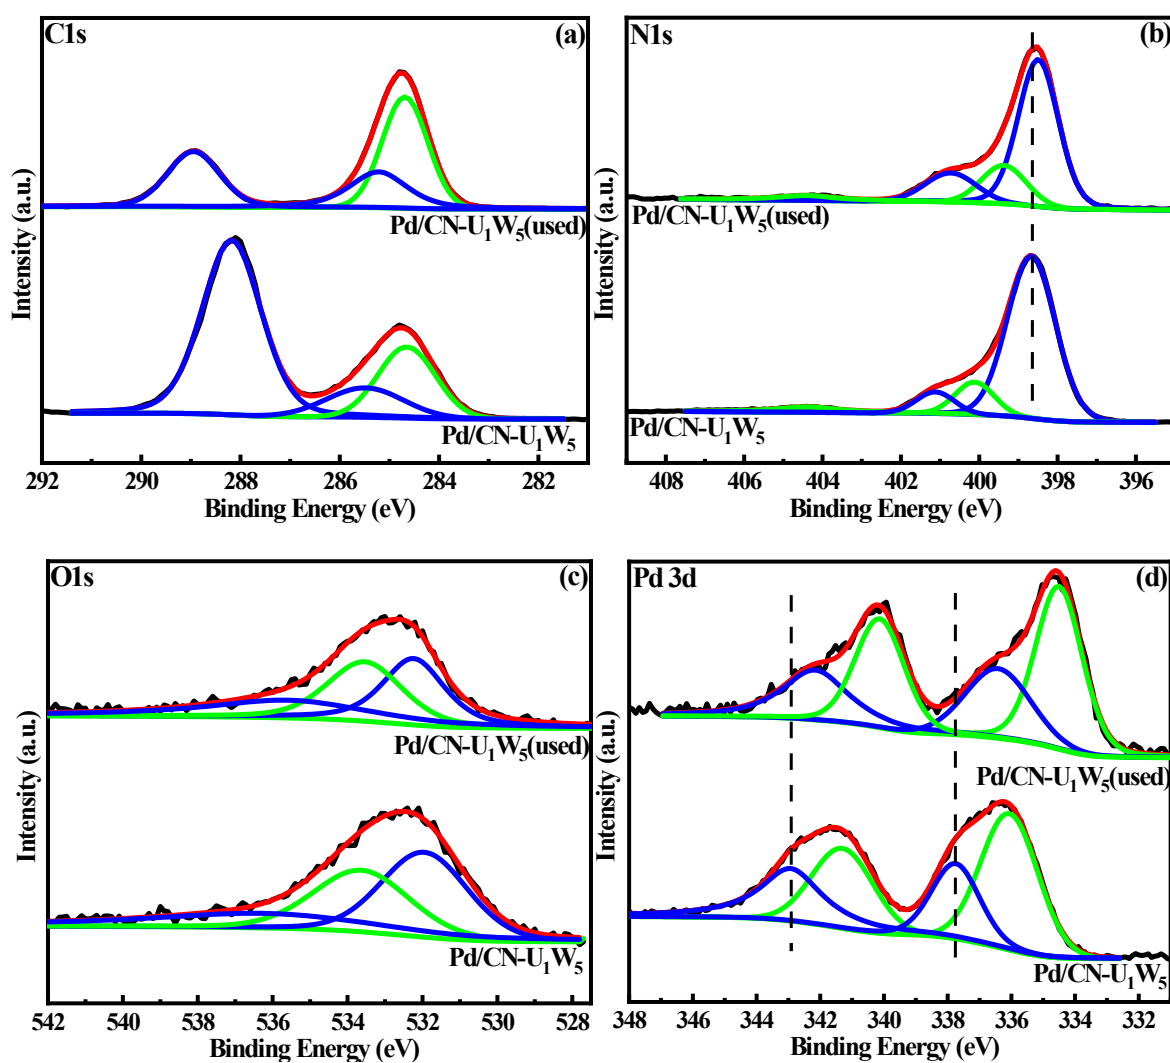

Fig. S5 XPS spectra of (a) N and (b) Pd (c) C 1s and (d) O 1s in Pd/CN-U<sub>1</sub>W<sub>5</sub> after cycling.

Table S1 Comparison of catalytic performance of different catalysts for hydrogen generation from

FA.

| Catalysts                                                         | T/K | Additive | TOF/h <sup>-1</sup> | Reference | E <sub>a</sub> (kJ/mol) |
|-------------------------------------------------------------------|-----|----------|---------------------|-----------|-------------------------|
| Ag <sub>9</sub> Pd <sub>91</sub> /g-C <sub>3</sub> N <sub>4</sub> | 323 | HCOONa   | 480                 | [S1]      | 25.8                    |
| PdAg/C-FA                                                         | 298 | HCOONa   | 90                  | [S2]      | -                       |
| C-Pd <sub>1</sub> Ag <sub>1</sub> BNSs                            | 323 | HCOONa   | 378                 | [S3]      | -                       |
| Ag <sub>18</sub> Pd <sub>82</sub> @ZIF-8                          | 353 | HCOONa   | 580                 | [S4]      | 51.4                    |
| AgPd@MIL-100(Fe)                                                  | 298 | -        | 58                  | [S5]      | -                       |
| Pd/mpg-C <sub>3</sub> N <sub>4</sub>                              | 298 | -        | 144                 | [S6]      | 29.1                    |
| Pd/CN-U <sub>1</sub> W <sub>5</sub>                               | 348 | HCOONa   | 1058                | this work | 29.7                    |

Table S2 The content of Pd and N-containing species of Pd/CN-U<sub>1</sub>W<sub>5</sub> catalyst before and after cycling.

| Sample                                         | Proportion of peak area |                 |             |            |             |              |
|------------------------------------------------|-------------------------|-----------------|-------------|------------|-------------|--------------|
|                                                | Pd <sup>2+</sup>        | Pd <sup>0</sup> | pyridinic N | pyrrolic N | graphitic N | π excitation |
| Pd/CN-U <sub>1</sub> W <sub>5</sub>            | 0.462                   | 0.538           | 0.756       | 0.119      | 0.077       | 0.047        |
| Pd/CN-U <sub>1</sub> W <sub>5</sub> (3 cycles) | 0.405                   | 0.595           | 0.635       | 0.173      | 0.149       | 0.043        |

[S1] F. Yao, X. Li, C. Wan, L. Xu, Y. An, M. Ye, Z. Lei, Highly efficient hydrogen release from formic acid using a graphitic carbon nitride-supported AgPd nanoparticle catalyst, *Appl. Surf. Sci.* 426 (2017) 605-611.

[S2] Y. Huang, J. Xu, T. Long, Q. Shuai, Q. Li, Reducing Agent-Structure-Activity Relationship of PdAg/C Catalysts in Formic Acid Decomposition for Hydrogen Generation, *J. Nanosci. Nanotechnol.* 17 (2017) 3798-3802.

[S3] C. Hu, X. Mu, J. Fan, H. Ma, X. Zhao, G. Chen, Z. Zhou, N. Zheng, Interfacial Effects in PdAg Bimetallic Nanosheets for Selective Dehydrogenation of Formic Acid, *ChemNanoMat* 2 (2016) 28-32.

[S4] H. Dai, B. Xia, L. Wen, C. Du, J. Su, W. Luo, G. Cheng, Synergistic catalysis of AgPd@ZIF-8 on dehydrogenation of formic acid, *Appl. Catal. B: Environ.* 165 (2015) 57-62.

[S5] F. Ke, L. Wang, J. Zhu, An efficient room temperature core-shell AgPd@MOF catalyst for hydrogen production from formic acid, *Nanoscale* 7 (2015) 8321-8325.

[S6] J. H. Lee, J. Ryu, J. Y. Kim, S. W. Nam, J. H. Han, T. H. Lim, S. Gautam, K. H. Chaec, C. W. Yoon, Carbon dioxide mediated, reversible chemical hydrogen storage using a Pd nanocatalyst supported on mesoporous graphitic carbon nitride, *J. Mater. Chem. A* 2 (2014) 9490-9495.
